# Supplementary material for: Government Policy for the Procurement of Food from Local Family Farming in Brazilian Public Institutions
Source: MDPI journal article supplement (doi:10.3390/foods10071604), 2021-07-10
Supplement: s1 [file s1]

# Compra de alimentos em Restaurante institucional

Instituição compradora

**\*Obrigatório**

1. 1. Em que tipo de instituição realiza suas atividades? \*

*Marcar apenas uma oval.*

- ☐ Escolas *Pular para a pergunta 3*
- ☐ Universidade *Pular para a pergunta 3*
- ☐ Hospitais *Pular para a pergunta 3*
- ☐ Restaurantes populares *Pular para a pergunta 3*
- ☐ Forças armadas *Pular para a pergunta 3*
- ☐ Presídios *Pular para a pergunta 3*
- ☐ Outras *Pular para a pergunta 2*

2. Especifique em que tipo de instituição realiza suas atividades \*

---

---

---

---

---

3. 2. Qual é o nome da instituição (escola, universidade, hospital, entre outros) em que realiza suas atividades?

---

4. 3. Qual a área de abrangência da instituição (escola, universidade, hospital, entre outros) em que realiza suas atividades? \*

*Marcar apenas uma oval.*

- ☐ Municipal *Pular para a pergunta 6*
- ☐ Regional *Pular para a pergunta 6*
- ☐ Estadual *Pular para a pergunta 6*
- ☐ Nacional *Pular para a pergunta 6*
- ☐ Outros *Pular para a pergunta 5*

5. Especifique a área de abrangência da instituição \*

---

---

---

---

---

6. 4. A instituição (escola, universidade, hospital, entre outros) é pública ou privada? \*

*Marcar apenas uma oval.*

- ☐ Pública
- ☐ Privada
- ☐ Não sabe informar

## 7. 5. Estado \*

*Marcar apenas uma oval.*

- ☐ Acre
- ☐ Alagoas
- ☐ Amapá
- ☐ Amazonas
- ☐ Bahia
- ☐ Ceará
- ☐ Distrito Federal
- ☐ Espírito Santo
- ☐ Goiás
- ☐ Maranhão
- ☐ Mato Grosso
- ☐ Mato Grosso do Sul
- ☐ Minas Gerais
- ☐ Pará
- ☐ Paraíba
- ☐ Paraná
- ☐ Pernambuco
- ☐ Piauí
- ☐ Rio de Janeiro
- ☐ Rio Grande do Norte
- ☐ Rio Grande do Sul
- ☐ Rondônia
- ☐ Roraima
- ☐ Santa Catarina
- ☐ São Paulo
- ☐ Sergipe
- ☐ Tocantins

## 8. 6. Nome da cidade \*

---

9. 7. Qual é o cargo que você exerce na instituição? \*

---

10. 8. No cargo que você exerce na instituição, participa de alguma das seguintes atividades? \*

*Marcar apenas uma oval por linha.*

|                                | Sim                   | Não                   | Não sabe informar     |
|--------------------------------|-----------------------|-----------------------|-----------------------|
| Elaboração da lista de compras | <input type="radio"/> | <input type="radio"/> | <input type="radio"/> |
| Planejamento do cardápio       | <input type="radio"/> | <input type="radio"/> | <input type="radio"/> |
| Seleção de fornecedores        | <input type="radio"/> | <input type="radio"/> | <input type="radio"/> |
| Compra de alimentos            | <input type="radio"/> | <input type="radio"/> | <input type="radio"/> |

#### CARACTERIZAÇÃO DO SERVIÇO DE ALIMENTAÇÃO DA INSTITUIÇÃO

11. 9. Qual a forma de gerenciamento do serviço de alimentação da instituição? \*

*Marcar apenas uma oval.*

- ☐ Terceirizada *Pular para a pergunta 13*
- ☐ Autogestão *Pular para a pergunta 13*
- ☐ Gestão mista *Pular para a pergunta 13*
- ☐ Outra *Pular para a pergunta 12*

12. Especifique qual é a forma de gerenciamento do serviço de alimentação \*

---

---

---

---

---

13. 10. A instituição conta com cozinha própria? \*

*Marcar apenas uma oval.*

☐ Sim

☐ Não *Pular para a pergunta 14*

14. 11. Qual o número de pessoas que são atendidas diariamente pela instituição e que poderiam utilizar o serviço de alimentação? \*

---

15. 12. A instituição oferece almoço? \*

*Marcar apenas uma oval.*

☐ Sim *Pular para a pergunta 16*

☐ Não

☐ Não sabe informar

16. 13. Qual o custo aproximado para a instituição do almoço por pessoa por dia? \*

---

17. 14. Qual o número almoços servidos diariamente pela instituição? \*

---

18. 15. A instituição desenvolve ações para promoção da alimentação saudável/educação alimentar e nutricional (EAN)? \*

*Marcar apenas uma oval.*

☐ Sim *Pular para a pergunta 19*

☐ Não *Pular para a pergunta 20*

☐ Não sabe informar *Pular para a pergunta 20*

19. 16. Quais ações para promoção da alimentação saudável/educação alimentar e nutricional são desenvolvidas? \*

---

---

---

---

---

20. 17. A instituição desenvolve ações para promoção da alimentação sustentável? \*

*Marcar apenas uma oval.*

- ☐ Sim      *Pular para a pergunta 21*
- ☐ Não      *Pular para a pergunta 22*
- ☐ Não sabe informar      *Pular para a pergunta 22*

21. 18. Quais ações para promoção da alimentação sustentável são desenvolvidas? \*

---

---

---

---

---

## COMPRA DE ALIMENTOS

22. 19. Para abastecer o serviço de alimentação, são comprados alimentos de agricultores(as) familiares do município ou da região? \*

*Marcar apenas uma oval.*

- ☐ Sim      *Pular para a pergunta 23*
- ☐ Não
- ☐ Não sabe informar

23. 20. Em que ano a instituição iniciou a compra de alimentos da agricultura familiar? \*

---

*Pular para a pergunta 25*

24. 21. A instituição teria interesse em comprar alimentos da agricultura familiar do município ou da região para abastecer o serviço de alimentação? \*

*Marcar apenas uma oval.*

☐ Sim

☐ Não

*Pular para a pergunta 39*

22. Quais alimentos são comprados da agricultura familiar?

25. 22.1 Vegetais (legumes e/ou hortaliças) \*

*Marcar apenas uma oval.*

☐ Sim *Pular para a pergunta 26*

☐ Não *Pular para a pergunta 27*

☐ Não sabe informar *Pular para a pergunta 27*

26. Quais vegetais (legumes e/ou hortaliças) são comprados? \*

---

---

---

---

---

22. Quais alimentos são comprados da agricultura familiar?

## 27. 22.2 Frutas \*

Marcar apenas uma oval.

- ☐ Sim      Pular para a pergunta 28
- ☐ Não      Pular para a pergunta 29
- ☐ Não sabe informar      Pular para a pergunta 29

## 28. Quais frutas são comprados? \*

---

---

---

---

---

## 22. Quais alimentos são comprados da agricultura familiar?

## 29. 22.3 Leguminosas (ex. Feijão) \*

Marcar apenas uma oval.

- ☐ Sim      Pular para a pergunta 30
- ☐ Não      Pular para a pergunta 31
- ☐ Não sabe informar      Pular para a pergunta 31

## 30. Quais leguminosas são comprados? \*

---

---

---

---

---

## 22. Quais alimentos são comprados da agricultura familiar?



## 31. 22.4 Cereais \*

*Marcar apenas uma oval.*

- ☐ Sim      *Pular para a pergunta 32*
- ☐ Não      *Pular para a pergunta 33*
- ☐ Não sabe informar      *Pular para a pergunta 33*

## 32. Quais cereais são comprados? \*

---

---

---

---

---

## 22. Quais alimentos são comprados da agricultura familiar?

## 33. 22.5 Carnes e ovos \*

*Marcar apenas uma oval.*

- ☐ Sim      *Pular para a pergunta 34*
- ☐ Não      *Pular para a pergunta 35*
- ☐ Não sabe informar      *Pular para a pergunta 35*

## 34. Quais carnes e ovos são comprados? \*

---

---

---

---

---

## 22. Quais alimentos são comprados da agricultura familiar?

## 35. 22.6 Leite e derivados \*

*Marcar apenas uma oval.*

- ☐ Sim *Pular para a pergunta 36*
- ☐ Não *Pular para a pergunta 37*
- ☐ Não sabe informar *Pular para a pergunta 37*

## 36. Quais leites e derivados são comprados? \*

---

---

---

---

---

## 22. Quais alimentos são comprados da agricultura familiar?

## 37. 22.7 Alimentos processados (polpa de fruta, sucos, bolacha, geleia, pão, bolo, etc.). \*

*Marcar apenas uma oval.*

- ☐ Sim *Pular para a pergunta 38*
- ☐ Não *Pular para a pergunta 39*
- ☐ Não sabe informar *Pular para a pergunta 39*

## 38. Quais alimentos processados são comprados? \*

---

---

---

---

---

## BENEFÍCIOS

39. 23. Em sua opinião, a compra de alimentos da agricultura familiar por instituições públicas pode gerar algum benefício? \*

*Marcar apenas uma oval.*

- ☐ Sim
- ☐ Não
- ☐ Não sabe informar

24. Em sua opinião, quais desses são benefícios de comprar alimentos da agricultura familiar para o abastecimento dos restaurantes institucionais?

40. 24 a. Estimula a economia local \*

*Marcar apenas uma oval.*

- ☐ Sim
- ☐ Não
- ☐ Não sabe informar

41. 24 b. Aumenta a quantidade de alimentos “in natura” produzidos na região \*

*Marcar apenas uma oval.*

- ☐ Sim
- ☐ Não
- ☐ Não sabe informar

42. 24 c. Aumenta a variedade de alimentos “in natura” produzidos na região \*

*Marcar apenas uma oval.*

- ☐ Sim
- ☐ Não
- ☐ Não sabe informar

43. 24 d. Aumenta a quantidade e a variedade de alimentos processados produzidos na região (polpa de fruta, sucos, bolacha, geleia, pão, bolo, etc.). \*

*Marcar apenas uma oval.*

- ☐ Sim
- ☐ Não
- ☐ Não sabe informar

44. 24 e. Aumenta a oferta de alimentos frescos na instituição \*

*Marcar apenas uma oval.*

- ☐ Sim
- ☐ Não
- ☐ Não sabe informar

45. 24 f. Aumenta a oferta de vegetais e de frutas no cardápio da instituição \*

*Marcar apenas uma oval.*

- ☐ Sim
- ☐ Não
- ☐ Não sabe informar

46. 24 g. Contribui no resgate de tradições alimentares da região \*

*Marcar apenas uma oval.*

- ☐ Sim
- ☐ Não
- ☐ Não sabe informar

47. 24 h. Melhora a qualidade da alimentação oferecida pela instituição \*

*Marcar apenas uma oval.*

- ☐ Sim
- ☐ Não
- ☐ Não sabe informar

48. 24 i. Contribui para a sustentabilidade do sistema alimentar \*

*Marcar apenas uma oval.*

- ☐ Sim
- ☐ Não
- ☐ Não sabe informar

49. 24 j. Aumenta a renda do agricultor \*

*Marcar apenas uma oval.*

- ☐ Sim
- ☐ Não
- ☐ Não sabe informar

50. 24 k. Garante mercado para a comercialização de alimentos produzidos pelos agricultores familiares da região \*

*Marcar apenas uma oval.*

- ☐ Sim
- ☐ Não
- ☐ Não sabe informar

51. 24 l. Outros benefícios, especifique.

---

---

---

---

---

#### DIFICULDADES

52. 25. Em sua opinião, existem dificuldades para realizar a compra/venda de alimentos da agricultura familiar para abastecer o serviço de alimentação de instituições (creches, escolas, restaurantes universitários, hospitais públicos)? \*

*Marcar apenas uma oval.*

- ☐ Sim
- ☐ Não
- ☐ Não sabe informar

26. Em sua opinião, quais dessas são dificuldades para a compra/venda de alimentos da agricultura familiar da região para abastecer os restaurantes institucionais

53. 26 a. A demanda de alimentos dos restaurantes institucionais é maior que a capacidade de produção dos agricultores familiares da região. \*

*Marcar apenas uma oval.*

- ☐ Sim
- ☐ Não
- ☐ Não sabe informar

54. 26 b. A sazonalidade da produção local não permite satisfazer a demanda de alimentos requeridos pela instituição, porque são solicitados alimentos que não estão disponíveis durante todo o ano. \*

*Marcar apenas uma oval.*

- ☐ Sim
- ☐ Não
- ☐ Não sabe informar

55. 26 c. A compra/venda institucional de alimentos é um processo muito burocrático e pode demorar muito tempo para ser efetivada, o que dificulta que os agricultores ajustem os tempos de produção agrícola com a demanda da instituição. \*

*Marcar apenas uma oval.*

- ☐ Sim
- ☐ Não
- ☐ Não sabe informar

56. 26 d. Os alimentos vendidos pelos agricultores familiares da região têm um custo mais elevado que aqueles comercializados por distribuidores. \*

*Marcar apenas uma oval.*

- ☐ Sim
- ☐ Não
- ☐ Não sabe informar

57. 26 e. Os alimentos da agricultura familiar não são bem aceitos/recebidos pelas entidades consumidoras. \*

*Marcar apenas uma oval.*

- ☐ Sim
- ☐ Não
- ☐ Não sabe informar

58. 26 f. Os critérios estabelecidos pela vigilância sanitária dificultam que a agricultura familiar da região comercialize seus produtos. \*

*Marcar apenas uma oval.*

- ☐ Sim
- ☐ Não
- ☐ Não sabe informar

59. 26 g. A instituição compradora (escolas, hospitais, etc) não dispõe da infraestrutura necessária para o armazenamento de alimentos frescos. \*

*Marcar apenas uma oval.*

- ☐ Sim
- ☐ Não
- ☐ Não sabe informar

60. 26 h. A falta de apoio da gestão pública e/ou do departamento de compras \*

*Marcar apenas uma oval.*

- ☐ Sim
- ☐ Não
- ☐ Não sabe informar



61. 26 i. Falta informação da instituição compradora sobre a possibilidade de comprar alimentos da agricultura familiar. \*

*Marcar apenas uma oval.*

- ☐ Sim
- ☐ Não
- ☐ Não sabe informar

62. 26 j. Falta informação por parte dos agricultores e suas organizações sobre a possibilidade de vender alimentos da agricultura familiar para instituições públicas. \*

*Marcar apenas uma oval.*

- ☐ Sim
- ☐ Não
- ☐ Não sabe informar

63. 26 k. A falta de assistência técnica para os agricultores da região dificulta a produção e comercialização de alimentos. \*

*Marcar apenas uma oval.*

- ☐ Sim
- ☐ Não
- ☐ Não sabe informar

64. 26 l. Os valores pagos pelas instituições públicas aos produtos da agricultura familiar são muito baixos. \*

*Marcar apenas uma oval.*

- ☐ Sim
- ☐ Não
- ☐ Não sabe informar

65. 26 m. Existem poucos agricultores/as familiares na região \*

*Marcar apenas uma oval.*

- ☐ Sim
- ☐ Não
- ☐ Não sabe informar

66. 26 n. Existem poucas organizações da agricultura familiar na região que comercializem alimentos. \*

*Marcar apenas uma oval.*

- ☐ Sim
- ☐ Não
- ☐ Não sabe informar

67. 26 o. As organizações de agricultores não dispõem da infraestrutura necessária para o processamento de alimentos (descascar, cortar, embalar, etc) demandados pela instituição \*

*Marcar apenas uma oval.*

- ☐ Sim
- ☐ Não
- ☐ Não sabe informar

68. 26 p. A logística de entrega dos produtos é muito custosa para as organizações de agricultores familiares e não compensa a venda para as instituições \*

*Marcar apenas uma oval.*

- ☐ Sim
- ☐ Não
- ☐ Não sabe informar

69. 26 m. Outras dificuldades, especifique

---

---

---

---

---

Este conteúdo não foi criado nem aprovado pelo Google.

Google Formulários
